# Supplementary material for: Efficient synthesis of anthranilic esters via Pd-catalyzed dehydrogenative/decarbonylative coupling of anilides and glyoxylates
Source: Royal Society of Chemistry journal article supplement (doi:10.1039/c2cc34473d), 2012-01-01

## Supporting Information

### Efficient synthesis of anthranilic esters via Pd-catalyzed dehydrogenative/decarbonylative coupling of anilides and glyoxylates

Sizhuo Wang, Zhiyong Yang, Jidan Liu, Kai Xie, Anwei Wang,  
Xiang chen, Ze Tan,\*

*State Key Laboratory of Chemo/Biosensing and Chemometrics, College of  
Chemistry and Chemical Engineering, Hunan University, Changsha*

*410082, P.R. China. Tel: +86-731 88822400;*

*E-mail: ztanze@gmail.com*

### Table of contents

|                                                             |           |
|-------------------------------------------------------------|-----------|
| <b>I.General information.....</b>                           | <b>S2</b> |
| <b>II.Experimental section.....</b>                         | <b>S2</b> |
| <b>III.References and note.....</b>                         | <b>S8</b> |
| <b>IV.<sup>1</sup>H and <sup>13</sup>C NMR Spectra.....</b> | <b>S8</b> |

## I. General Information

All the solvents and commercially available reagents were purchased from commercial sources and used directly.  $^1\text{H}$  NMR and  $^{13}\text{C}$  NMR were recorded in  $\text{CDCl}_3$  at room temperature on the Varian INOVA-400 spectrometer (400 MHz  $^1\text{H}$ ). The chemical-shifts scale is based on internal TMS. The coupling constants,  $J$ , are reported in Hertz (HZ). Products were purified by flash column chromatography on 200-300 mesh silica gel,  $\text{SiO}_2$ .

## II. Representative Procedure and Selected Compounds Data

### 2-Acetylamino-benzoic acid ethyl ester

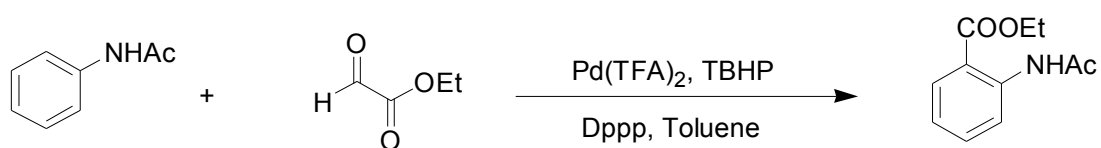

A 25 mL tube was charged with acetanilide (67.5mg, 0.5mmol), glyoxylate (204mg, 1.0mmol), TBHP (0.36mL, 2.0mmol), dppp (20.7mg, 0.05mmol),  $\text{Pd}(\text{TFA})_2$  (13.9mg, 0.05 mmol) and toluene (1mL). The reaction tube was then capped under  $\text{N}_2$  and stirred at  $120^\circ\text{C}$  for 16-24h. Upon completion of the reaction, the reaction tube was allowed to cool room temperature and quenched with brine and diluted with DMC. The organic layer was separated and the aqueous layer was washed with DMC. The filtrate was concentrated under reduced pressure. The crude products were purified with flash column chromatography on silica gel (petroleum ether/ethyl acetate, 8/1) to afford 56.9 mg of the desired 2-Acetylamino –benzoic acid ethyl ester in 55% yield. Better yield (66%) can be obtained if the reaction was stopped at 12h, and another batch of  $\text{Pd}(\text{TFA})_2$  (5mol%) was added.

## Analytical data of Acetylamino-benzoic acid ethyl ester

### 2-Acetylamino-benzoic acid ethyl ester<sup>1-4</sup>

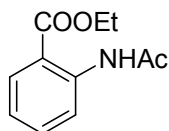

**TLC:**  $R_f = 0.60$  (petroleum ether/ ethyl acetate, 4/1); Yield 66%;

**<sup>1</sup>H NMR (400 MHz, CDCl<sub>3</sub>):**  $\delta$  11.14 (s, 1H), 8.70 (d,  $J = 8.4$ Hz, 1H), 8.04-8.06 (m, 1H), 7.52-7.56 (m, 1H), 7.07-7.10 (m, 1H), 4.38 (q,  $J = 7.2$ Hz, 2H), 2.25 (s, 3H), 1.42 (t,  $J = 7.2$ Hz, 3H);

**<sup>13</sup>C NMR (100MHz, CDCl<sub>3</sub>):**  $\delta$  169.22, 168.29, 141.46, 134.54, 130.73, 122.38, 120.23, 114.98, 61.38, 25.48, 14.15;

**HRMS:** calcd for C<sub>11</sub>H<sub>13</sub>NO<sub>3</sub> : 207.0895 , found: 207.0893;

### 2-Acetylamino-5-methyl-benzoic acid ethyl ester

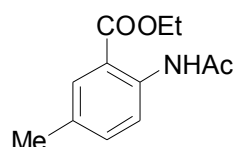

**TLC:**  $R_f = 0.6$  (petroleum ether/ethyl acetate, 4/1); Yield 60%;

**<sup>1</sup>H NMR (400 MHz, CDCl<sub>3</sub>):**  $\delta$  11.00 (s, 1H), 8.58 (d,  $J = 8.8$ Hz, 1H), 7.83 (s, 1H), 7.35 (dd,  $J = 8.8$ Hz, 2Hz, 1H), 4.37 (dd,  $J = 14.4$ Hz, 6.4Hz, 2H), 2.33 (s, 3H) , 2.23 (s, 3H), 1.43 (t,  $J = 7.2$ Hz, 3H);

**<sup>13</sup>C NMR (100MHz, CDCl<sub>3</sub>):**  $\delta$  168.89, 168.32, 139.12, 135.22, 131.84, 130.74, 120.19, 114.85, 61.28, 25.44, 20.65, 14.17;

**LRMS:** m/z calcd for C<sub>12</sub>H<sub>15</sub>NO<sub>3</sub> : 221, found: 221;

**Anal.** Calcd for C<sub>12</sub>H<sub>15</sub>NO<sub>3</sub> : C, 65.14; H, 6.83; N, 6.33; Found: C, 65.37; H, 6.96; N, 6.58;

**IR.(KBr)/cm<sup>-1</sup>:** 3268, 2925, 1694, 1239;

### 2-Acetylamino-5-fluoro-benzoic acid ethyl ester

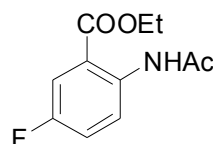

**TLC:**  $R_f = 0.45$  (petroleum ether/ ethyl acetate, 4/1); Yield 40%;

**<sup>1</sup>H NMR (400 MHz, CDCl<sub>3</sub>):**  $\delta$  10.97 (s, 1H), 8.71 (dd,  $J = 9.6$  Hz, 5.2 Hz, 1H), 7.72 (dd,  $J = 9.2$  Hz, 3.2 Hz, 1H), 7.29-7.24 (m, 1H), 4.39 (dd,  $J = 14.4$  Hz, 7.6 Hz, 2H), 2.24 (s, 3H), 1.43 (t,  $J = 7.2$ Hz, 3H);

**<sup>13</sup>C NMR (100MHz, CDCl<sub>3</sub>):**  $\delta$  168.93, 167.23, 157.15 (d,  $J_{C-F} = 241$  Hz), 137.92, 122.07 (d,  $J_{C-F} = 7.6$  Hz ), 121.53 (d,  $J_{C-F} = 21.3$  Hz), 116.72 (d,  $J_{C-F} = 24.4$

Hz), 116.24 (d,  $J_{C-F} = 6.8$  Hz), 61.80, 25.38, 14.10;

**HRMS:**  $m/z$  calcd for  $C_{11}H_{12}FNO_3$ : 225.0801, found: 225.0804;

**IR.**(KBr)/ $cm^{-1}$ : 3281, 2987, 1701, 1236;

### 2-Acetylamino-5-chloro-benzoic acid ethyl ester

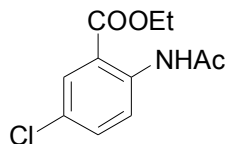

**TLC:**  $R_f=0.45$  (petroleum ether/ ethyl acetate, 4/1); Yield 41%;

**$^1H$  NMR (400 MHz,  $CDCl_3$ ):**  $\delta$  11.05(s, 1H), 8.69 (d,  $J = 9.2$ Hz, 1H), 7.99 (s, 1H), 7.48 (dd,  $J = 9.2$ Hz, 2.8Hz, 1H), 4.18-4.36(m, 2H), 2.24 (s, 3H), 1.43 (t,  $J = 6.8$ Hz, 3H);

**$^{13}C$  NMR (100MHz,  $CDCl_3$ ):**  $\delta$  169.09, 167.22, 140.08, 134.32, 130.27, 127.33, 121.64, 116.18, 61.85, 25.46, 14.12.

**HRMS:**  $m/z$  calcd for  $C_{11}H_{12}ClNO_3$ : 241.0506, found: 241.0510;

**IR.**(KBr)/ $cm^{-1}$ : 3265, 2961, 1703, 1235;

### 2-Acetylamino-4-methoxy-benzoic acid ethyl ester

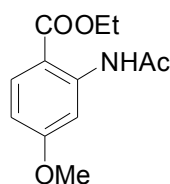

**TLC:**  $R_f = 0.56$  (petroleum ether/ ethyl acetate, 4/1); Yield 51%;

**$^1H$  NMR (400 MHz,  $CDCl_3$ ):**  $\delta$  11.34(s, 1H), 8.38(d,  $J = 2.4$ Hz, 1H), 7.97 (d,  $J = 8.8$ Hz, 1H), 6.60 (dd,  $J = 12$ Hz, 2.8Hz, 1H), 4.37-4.32 (m, 2H), 3.87 (s, 3H), 2.24 (s, 3H), 1.40 (t,  $J = 7.2$ Hz, 3H);

**$^{13}C$  NMR (100MHz,  $CDCl_3$ ):**  $\delta$  169.33, 168.19, 164.35, 143.73, 132.31, 109.62, 107.41, 103.72, 60.94, 55.49, 25.61, 14.21;

**HRMS:**  $m/z$  calcd for  $C_{12}H_{15}NO_4$ : 237.1001, found: 237.1008;

### 2-Acetylamino-5-propoxy-benzoic acid ethyl ester

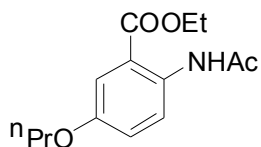

**TLC:**  $R_f = 0.58$  (petroleum ether/ ethyl acetate, 4/1); Yield 58%;

**$^1H$  NMR (400 MHz,  $CDCl_3$ ):**  $\delta$  10.84(s, 1H), 8.60 (d,  $J = 9.2$ Hz, 1H), 7.53 (s, 1H), 7.11 (dd,  $J = 9.2$ Hz, 3.2Hz, 1H), 4.40-4.35 (m, 2H), 3.92 (t,  $J = 6.8$ Hz, 2H), 2.22 (s, 3H), 1.84-1.79 (m, 2H), 1.42(t,  $J = 7.2$ Hz, 3H), 1.05 (t,  $J = 7.6$ Hz, 3H);

**$^{13}C$  NMR (100MHz,  $CDCl_3$ ):**  $\delta$  168.64, 167.94, 153.81, 134.96, 121.72, 120.85, 116.08, 115.59, 69.82, 61.41, 25.32, 22.48, 14.15, 10.46;

**HRMS:**  $m/z$  calcd for  $C_{14}H_{19}NO_4$ : 265.1314, found: 265.1318;

### 2-Acetylamino-4-chloro-benzoic acid ethyl ester

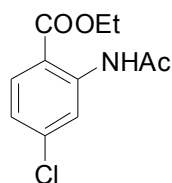

**TLC:**  $R_f = 0.45$  (petroleum ether/ ethyl acetate, 4/1); Yield 49%;

**$^1\text{H NMR}$  (400 MHz,  $\text{CDCl}_3$ ):**  $\delta$  11.19 (s, 1H), 8.80 (d,  $J = 2\text{Hz}$ , 1H), 7.97 (d,  $J = 8.8\text{Hz}$ , 1H), 7.05 (dd,  $J = 8.4\text{Hz}$ , 2.4Hz, 1H), 4.38 (dd,  $J = 14.4\text{Hz}$ , 7.6Hz, 2H), 2.25 (s, 3H), 1.42 (t,  $J = 6.8\text{Hz}$ , 3H);

**$^{13}\text{C NMR}$  (100MHz,  $\text{CDCl}_3$ ):**  $\delta$  169.29, 167.71, 142.30, 140.81, 131.80, 128.79, 122.64, 120.80, 113.13, 16.64, 25.47, 14.12;

**LRMS:**  $m/z$  calcd for  $\text{C}_{11}\text{H}_{12}\text{ClNO}_3$ : 241, found: 241;

**Anal.** Calcd for  $\text{C}_{11}\text{H}_{12}\text{ClNO}_3$ : C, 54.67; H, 5.00; N, 5.80; Found: C, 54.60; H, 4.95; N, 5.74;

### 2-Acetylamino-5-butoxy-benzoic acid ethyl ester

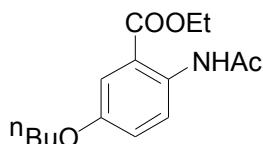

**TLC:**  $R_f = 0.60$  (petroleum ether/ ethyl acetate, 4/1); Yield 54%;

**$^1\text{H NMR}$  (400 MHz,  $\text{CDCl}_3$ ):**  $\delta$  10.83 (s, 1H), 8.60(d,  $J = 9.2\text{Hz}$ , 1H), 7.52 (s, 1H), 7.11 (d,  $J = 9.2\text{Hz}$ , 1H), 4.04 (t,  $J = 7.6\text{Hz}$ , 2H), 3.96 (t,  $J = 6.8\text{Hz}$ , 2H), 2.22 (s, 3H), 1.79-1.75 (m, 2H), 1.53-1.47 (m, 2H), 1.44-1.40 (m, 3H), 0.98(t,  $J = 14.8\text{Hz}$ , 3H);

**$^{13}\text{C NMR}$  (100MHz,  $\text{CDCl}_3$ ):**  $\delta$  168.64, 167.96, 153.84, 134.98, 121.74, 120.85, 116.10, 115.60, 68.02, 61.43, 31.20, 25.34, 19.17, 14.17, 13.83;

**HRMS:**  $m/z$  calcd for  $\text{C}_{15}\text{H}_{21}\text{NO}_4$ : 279.1471, found: 279.1474;

### 2-Acetylamino-5-methoxy-benzoic acid ethyl ester

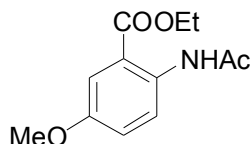

**TLC:**  $R_f = 0.55$  (petroleum ether/ ethyl acetate, 4/1); Yield 63%;

**$^1\text{H NMR}$  (400 MHz,  $\text{CDCl}_3$ ):**  $\delta$  10.82 (s, 1H), 8.61(d,  $J = 9.2\text{Hz}$ , 1H), 7.52 (s, 1H), 7.11 (dd,  $J = 9.6\text{Hz}$ , 3.6Hz, 1H), 4.38 (dd,  $J = 14.8\text{Hz}$ , 7.6Hz, 2H), 3.82 (s, 3H), 2.21 (s, 3H), 1.41 (t,  $J = 6.8\text{Hz}$ , 3H);

**$^{13}\text{C NMR}$  (100MHz,  $\text{CDCl}_3$ ):**  $\delta$  168.66, 167.90, 154.23, 135.19, 121.81, 120.47, 116.09, 114.75, 61.47, 55.56, 25.35, 14.16;

**LRMS:**  $m/z$  calcd for  $\text{C}_{12}\text{H}_{15}\text{NO}_4$ : 237.1001, found: 237.0944;

**Anal.** Calcd for  $\text{C}_{12}\text{H}_{15}\text{NO}_4$ : C, 60.75; H, 6.37; N, 5.90; Found: C, 60.97; H, 6.10;

N, 5.63;

**IR.(KBr)/cm<sup>-1</sup>:** 3267, 2982, 1680, 1240;

**2-Acetylamino-4-fluoro-benzoic acid ethyl ester**

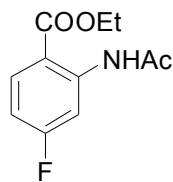

**TLC:** R<sub>f</sub> = 0.45 (petroleum ether/ ethyl acetate, 4/1); Yield 41%;

**<sup>1</sup>H NMR (400 MHz, CDCl<sub>3</sub>):** δ 11.29 (s, 1H), 8.53 (dd, *J* = 12.4Hz, 2.8Hz, 1H), 8.06 (dd, *J* = 7.2Hz, 1H), 6.79-6.74 (m, 1H), 4.38 (dd, *J* = 14.8Hz, 7.2Hz, 2H), 2.25 (s, 3H), 1.42 (t, *J* = 7.2Hz, 3H);

**<sup>13</sup>C NMR (100MHz, CDCl<sub>3</sub>):** δ 169.36, 167.65, 166.19 (d, *J*<sub>C-F</sub> = 251 Hz), 143.65 (d, *J*<sub>C-F</sub> = 13 Hz), 132.54 (d, *J*<sub>C-F</sub> = 10.7 Hz), 111.10, 109.69 (d, *J*<sub>C-F</sub> = 22.9 Hz), 107.32 (d, *J*<sub>C-F</sub> = 27.5 Hz), 61.48, 25.48, 14.17;

**LRMS:** m/z calcd for C<sub>11</sub>H<sub>12</sub>FNO<sub>3</sub>: 225, found: 225;

**Anal.** Calcd for C<sub>11</sub>H<sub>12</sub>FNO<sub>3</sub>: C, 58.66; H, 5.37; N, 6.22; Found: C, 58.89; H, 5.18; N, 6.02.

**2-Acetylamino-5-ethoxy-benzoic acid ethyl ester**

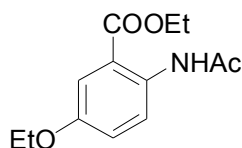

**TLC:** R<sub>f</sub> = 0.57 (petroleum ether/ ethyl acetate, 4/1); Yield 62%;

**<sup>1</sup>H NMR (400 MHz, CDCl<sub>3</sub>):** δ 10.84(s, 1H), 8.61 (d, *J* = 9.2Hz, 1H), 7.53(s, 1H), 7.10 (dd, *J* = 9.2Hz, 2.8Hz, 1H), 4.37 (dd, *J* = 14Hz, 6.8Hz, 2H), 4.04 (dd, *J* = 14Hz, 7.2Hz, 2H), 2.22 (s, 3H), 1.44-1.40 (m, 6H);

**<sup>13</sup>C NMR (100MHz, CDCl<sub>3</sub>):** δ 167.71, 166.95, 152.64, 134.04, 120.77, 119.86, 115.13, 114.62, 62.84, 60.45, 24.34, 13.75, 13.17;

**HRMS:** m/z calcd for C<sub>13</sub>H<sub>17</sub>NO<sub>4</sub>: 251.1158, found: 251.1156;

**2-Acetylamino-5-ethyl-benzoic acid ethyl ester**

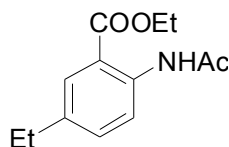

**TLC:** R<sub>f</sub> = 0.58 (petroleum ether/ ethyl acetate, 4/1); Yield 61%;

**<sup>1</sup>H NMR (400 MHz, CDCl<sub>3</sub>):** δ 11.00 (s, 1H), 8.59 (d, *J* = 8.8Hz, 1H), 7.85 (s, 1H), 7.38 (dd, *J* = 8.4Hz, 2Hz, 1H), 4.40 (dd, *J* = 14.4Hz, 7.2Hz, 2H), 2.63 (dd, *J* = 15.2Hz, 7.6Hz, 2H), 2.23 (s, 3H), 1.43 (t, *J* = 7.2Hz, 3H), 1.23 (t, *J* = 7.6Hz, 3H);

**<sup>13</sup>C NMR (100MHz, CDCl<sub>3</sub>):** δ 168.91, 168.37, 139.31, 138.28, 134.13, 129.66, 120.35, 114.95, 61.29, 28.10, 25.46, 15.59, 14.20;

**LRMS:** m/z calcd for C<sub>13</sub>H<sub>17</sub>NO<sub>3</sub>: 235, found: 235;

**Anal.** Calcd for C<sub>13</sub>H<sub>17</sub>NO<sub>3</sub> : C, 66.36; H, 7.28; N, 5.95; Found: C, 66.17; H, 7.42; N, 5.55;

### 2-Acetylamino-5-isopropyl-benzoic acid ethyl ester

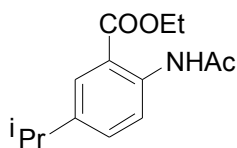

**TLC:** R<sub>f</sub> = 0.56 (petroleum ether/ ethyl acetate, 4/1); Yield 62%;

**<sup>1</sup>H NMR (400 MHz, CDCl<sub>3</sub>):** δ 11.00(s, 1H), 8.60(d, *J* = 8.8Hz, 1H), 7.86 (s, 1H), 7.42 (dd, *J* = 8.8Hz, 2.4Hz, 1H), 4.39 (dd, *J* = 14.8Hz, 5.6Hz, 2H), 2.94-2.87 (m, 1H), 2.23 (s, 3H), 1.43 (t, *J* = 6.8Hz, 3H), 1.25-1.24 (m, 6H);

**<sup>13</sup>C NMR (100MHz, CDCl<sub>3</sub>):** δ 168.91, 168.39, 142.88, 139.37, 132.65, 128.29, 120.41, 114.95, 61.30, 33.44, 25.44, 23.85, 14.21;

**LRMS:** *m/z* calcd for C<sub>14</sub>H<sub>19</sub>NO<sub>3</sub>: 249 , found: 249;

**Anal.** Calcd for C<sub>14</sub>H<sub>19</sub>NO<sub>3</sub> : C, 67.45; H, 7.68; N, 5.62; Found: C, 67.11; H, 7.74; N, 5.49;

### 2-Propionylamino-5-methyl-benzoic acid ethyl ester

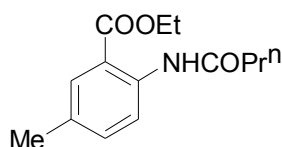

**TLC:** R<sub>f</sub> = 0.49 (petroleum ether/ ethyl acetate, 4/1); Yield 47%;

**<sup>1</sup>H NMR (400 MHz, CDCl<sub>3</sub>):** δ 11.02(s, 1H), 8.62 (d, *J* = 8.8Hz, 1H), 7.83(s, 1H), 7.35 (dd, *J* = 8.8Hz, 2Hz, 1H), 4.37 (dd, *J* = 14Hz, 6.8Hz, 2H), 2.47 (dd, *J* = 14.8Hz, 7.2Hz, 2H), 2.33 (s, 3H), 1.42 (t, *J* = 7.6Hz, 3H), 1.27 (t, *J* = 7.6Hz, 3H);

**<sup>13</sup>C NMR (100MHz, CDCl<sub>3</sub>):** δ 172.69, 168.35, 139.26, 135.25, 131.69, 130.76, 120.23, 114.83, 61.25, 31.61, 20.65, 14.19, 9.63;

**HRMS:** *m/z* calcd for C<sub>13</sub>H<sub>17</sub>NO<sub>3</sub> : 235.1208 , found: 235.1210;

**IR.(KBr)/cm<sup>-1</sup>:** 3262, 2938, 1689, 1235;

### 2-Propionylamino-5- methoxy-benzoic acid ethyl ester

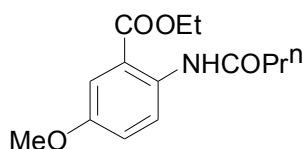

**TLC:** R<sub>f</sub> = 0.46 (petroleum ether/ ethyl acetate, 4/1); Yield 45%;

**<sup>1</sup>H NMR (400 MHz, CDCl<sub>3</sub>):** δ 10.87 (s, 1H), 8.66 (d, *J* = 9.6Hz, 1H), 7.53 (d, *J* = 2.8Hz, 1H), 7.12 (dd, *J* = 9.2Hz, 2.8Hz, 1H), 4.38 (dd, *J* = 14.4Hz, 7.2Hz, 2H), 3.82 (s, 3H), 2.46 (dd, *J* = 15.2Hz, 7.6Hz, 2H), 1.42 (t, *J* = 7.2Hz, 3H), 1.27 (t, *J* = 7.6Hz, 3H);

**<sup>13</sup>C NMR (100MHz, CDCl<sub>3</sub>):** δ 172.45, 167.91, 154.15, 135.32, 121.82, 120.48, 116.06, 114.78, 61.43, 55.56, 31.52, 14.16, 9.66;

**HRMS:** m/z calcd for C<sub>13</sub>H<sub>17</sub>NO<sub>4</sub>: 251.1158 , found: 251.1160;

### **III. References and notes**

- 1 H. Hiroshi, I. Naoto, *Tetrahed. Lett.* 1979, **26**, 2403.
- 2 K. Clausen, S. O. Lawesson, *Bull. Soc. Chim. Belg.* 1979, **88**, 305.
- 3 L. K. Sharma, , S. Kumar, P. Yadav, R. K. P. Singh, *Indian J. Chem. B* 2008, **47B**, 1277.
- 4 R. Shang, Y. Fu, J. B. Li, S. L. Zhang, Q.X. Guo, L. Liu. *J. Am. Chem. Soc.* 2009, **131**, 5738.

### **IV. <sup>1</sup>H and <sup>13</sup>C NMR Spectra**



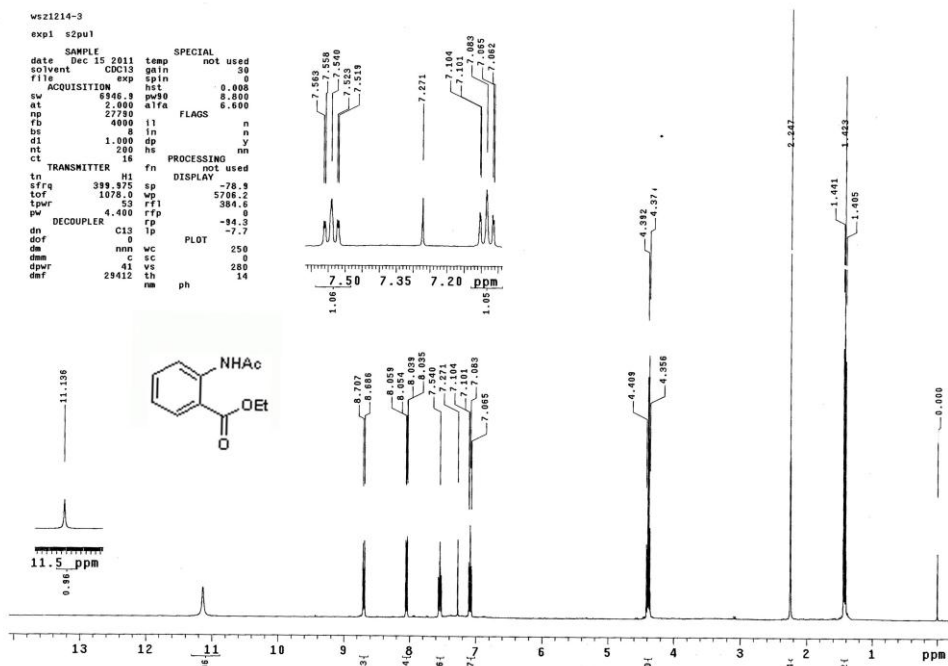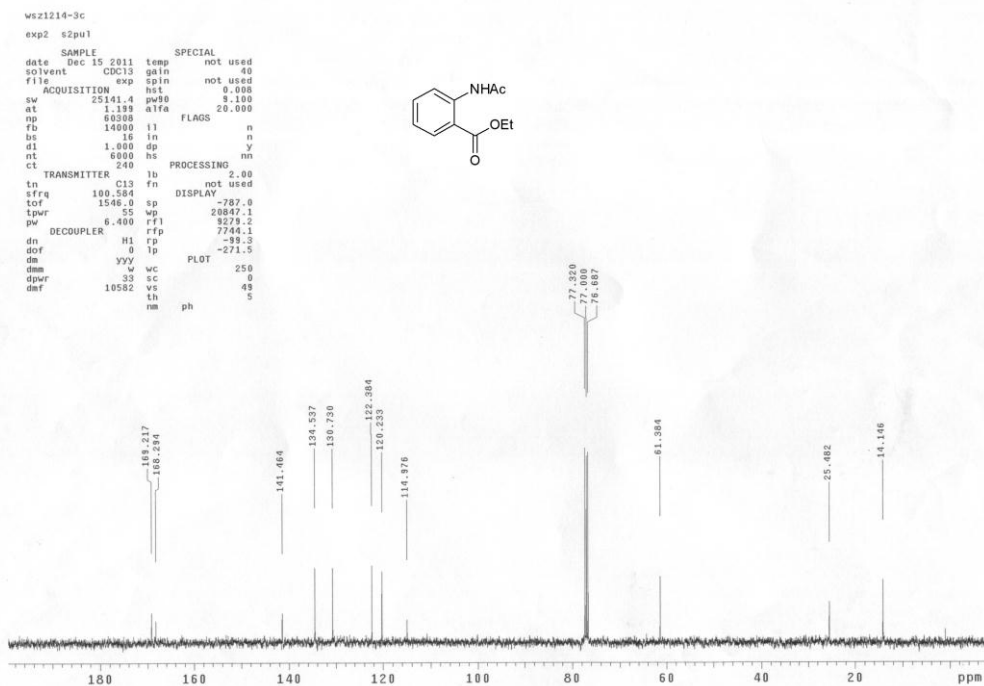

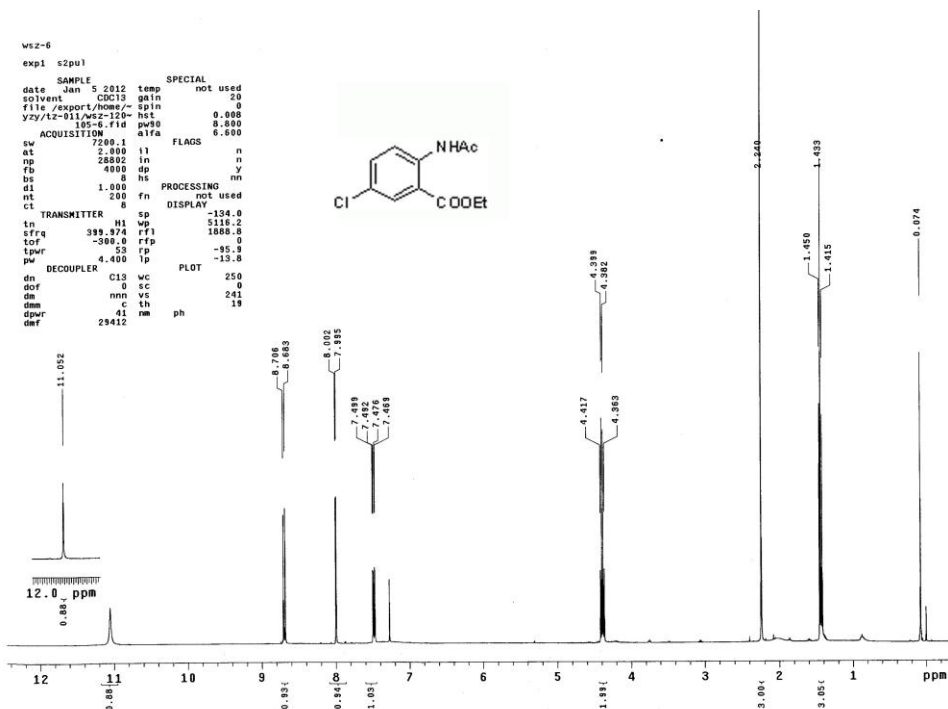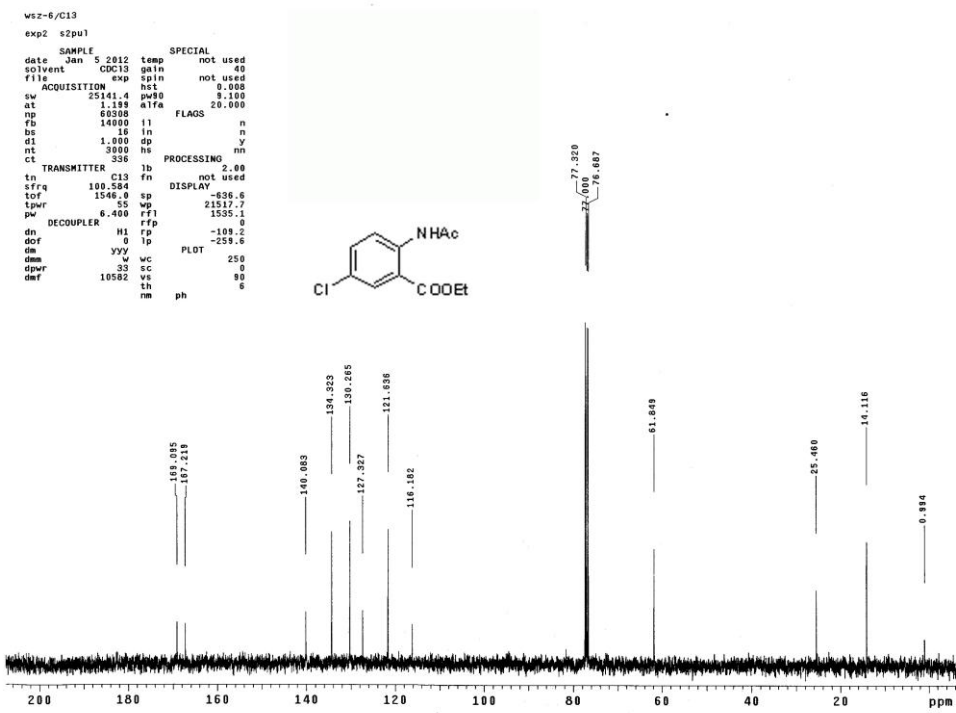

```

wsz-1
exp1 s2pu1
SAMPLE
date Jan 5 2012 temp not used
solvent CDCl3 gain 20
file
ACQUISITION exp spIn 0.000
sw 7200.1 pw90 8.000
at 2.000 alfa 8.500
np 28802 FLAGS
fb 4000 it n
bs 16 in n
dl 1.000 dp n
nt 200 hs n
ct
TRANSMITTER 16 fn PROCESSING not used
tn H1 DISPLAY -71.2
effq 399.874 sp 5136.8
tof -300.0 wp 1887.3
lpwr 53 rfl
pw 4.400 rfp 0
dn DECOUPLER C13 rp -11.3
dof 0 PLOT 250
dm mna wc
dwa C sc 130
dpwr 41 vs
daf 29412 th 9
nm ph
    
```

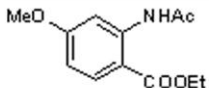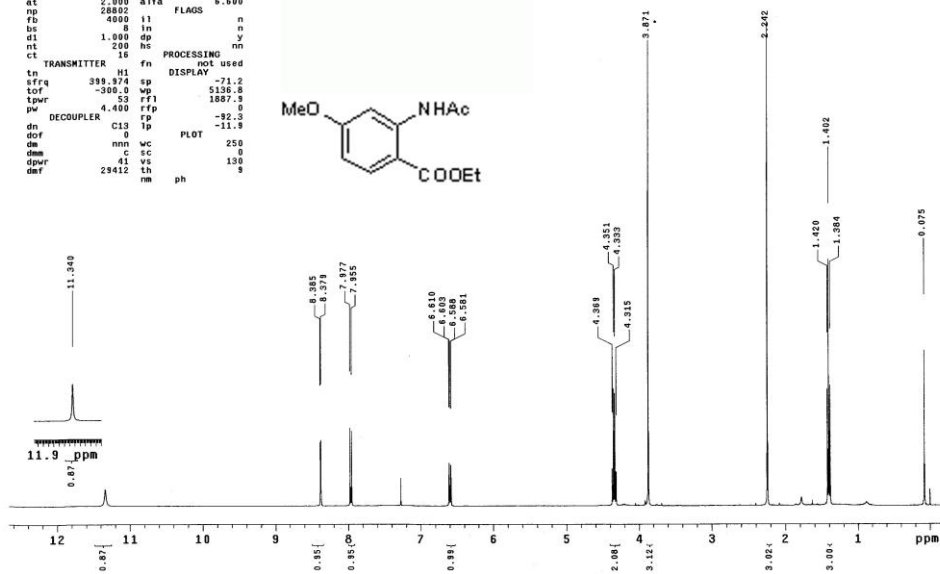

```

wsz-1/C13
exp2 s2pu1
SAMPLE
date Jan 5 2012 temp not used
solvent CDCl3 gain 40
file
ACQUISITION exp spIn not used
sw 6900.0 hst 0.000
at 2.014.4 pw90 8.100
np 28802 alfa 20.000
fb 4000 it n
bs 16 in n
dl 1.000 dp y
nt 200 hs y
ct
TRANSMITTER C13 fb PROCESSING 2.00
tn H1 DISPLAY not used
effq 100.584 sp -1906.4
tof 1546.0 wp 22133.8
lpwr 55 rfl 8279.2
pw 0.400 rfp 7744.1
dn DECOUPLER H1 rp -122.7
dof 0 PLOT 250
dm yyy w wc
dwa 33 sc 0
dpwr 10562 vs 71
daf nm th 4
nm ph
    
```

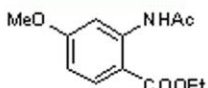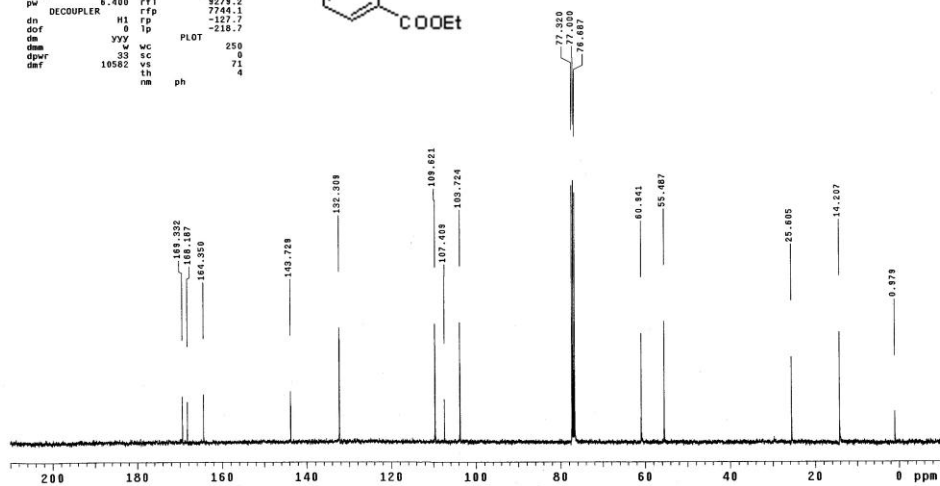

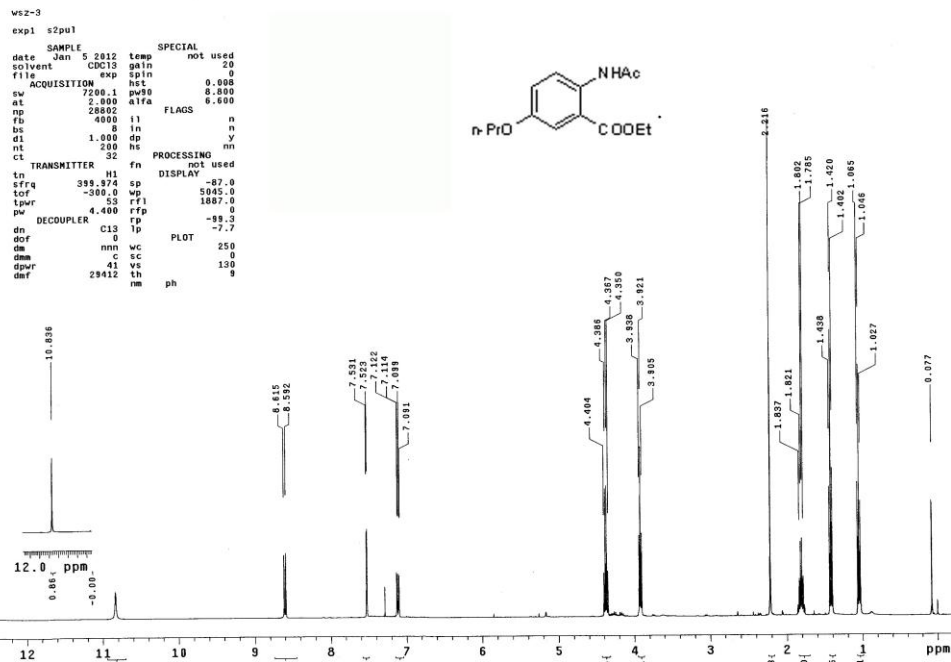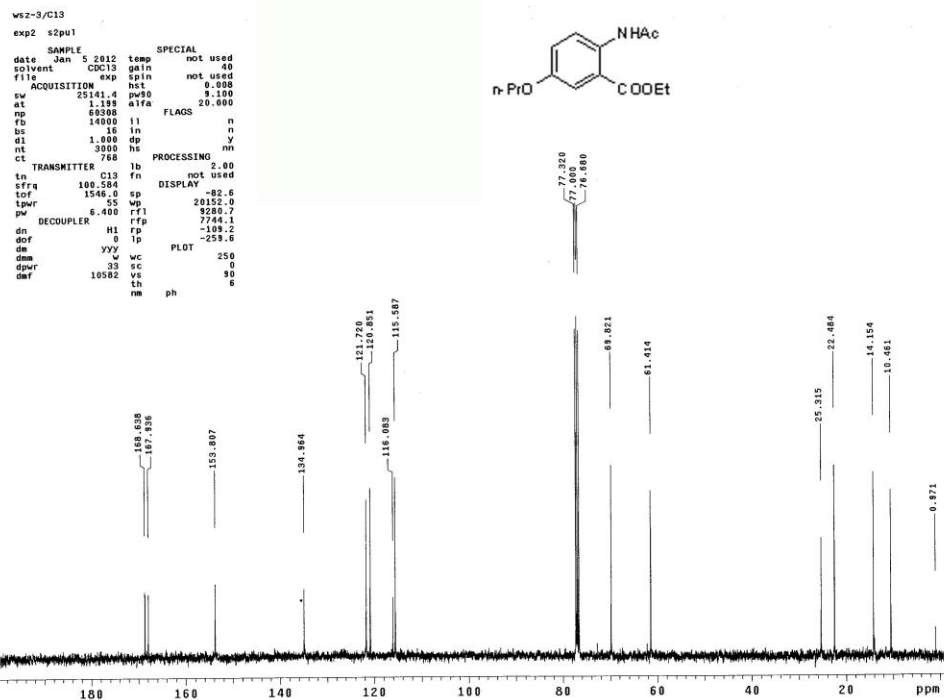

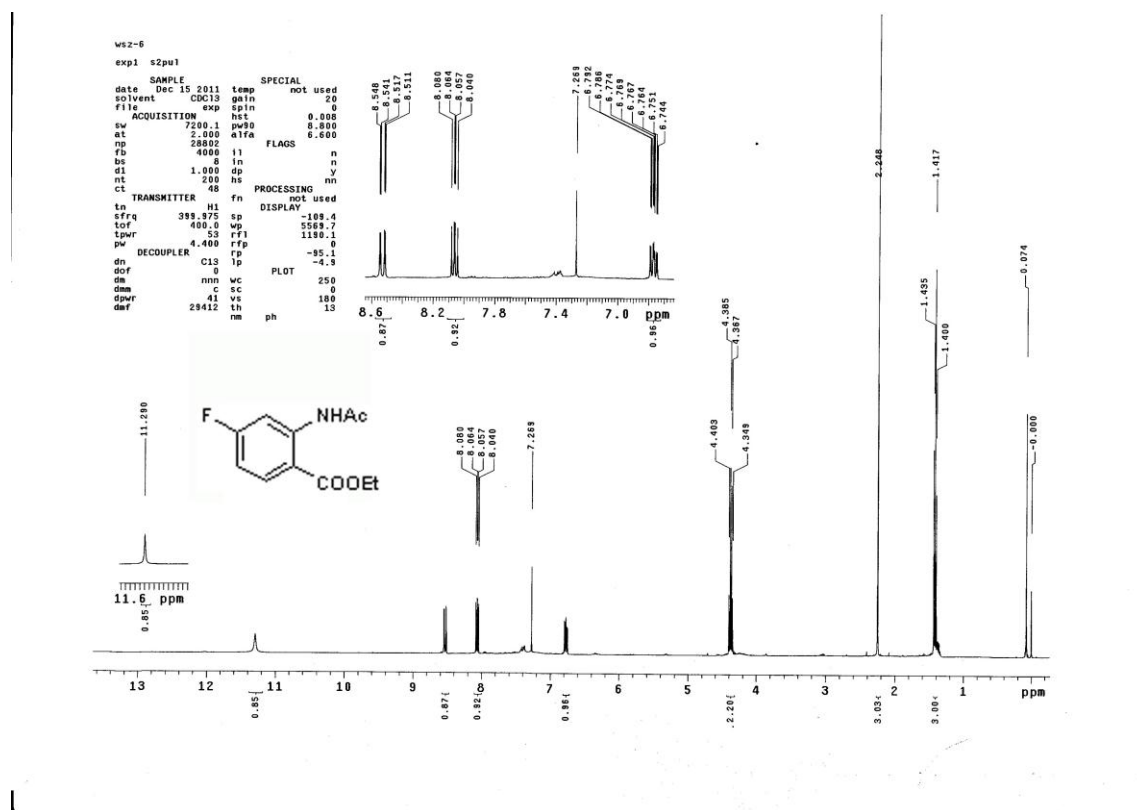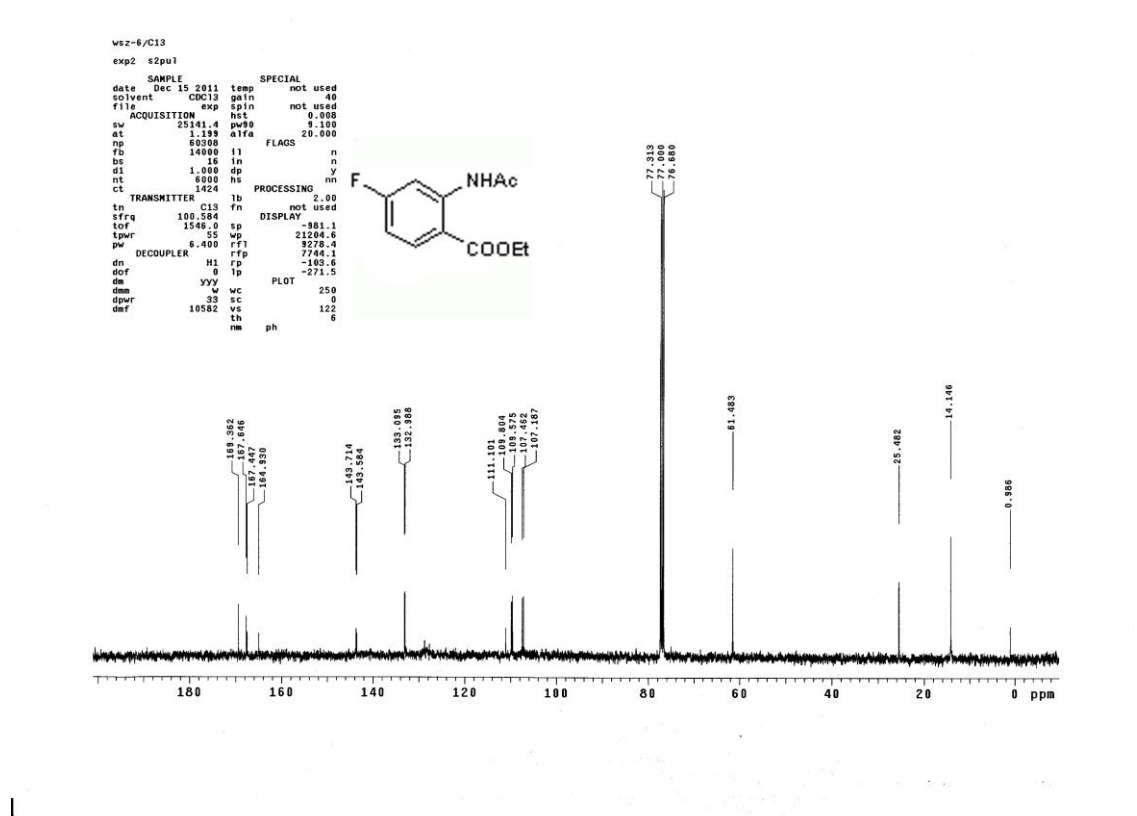

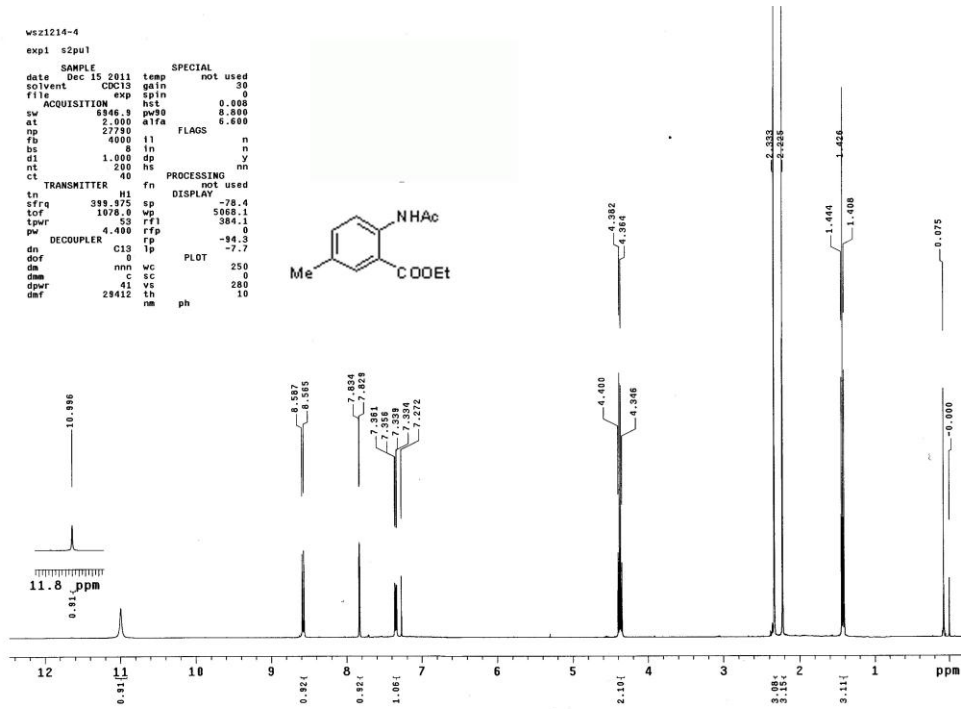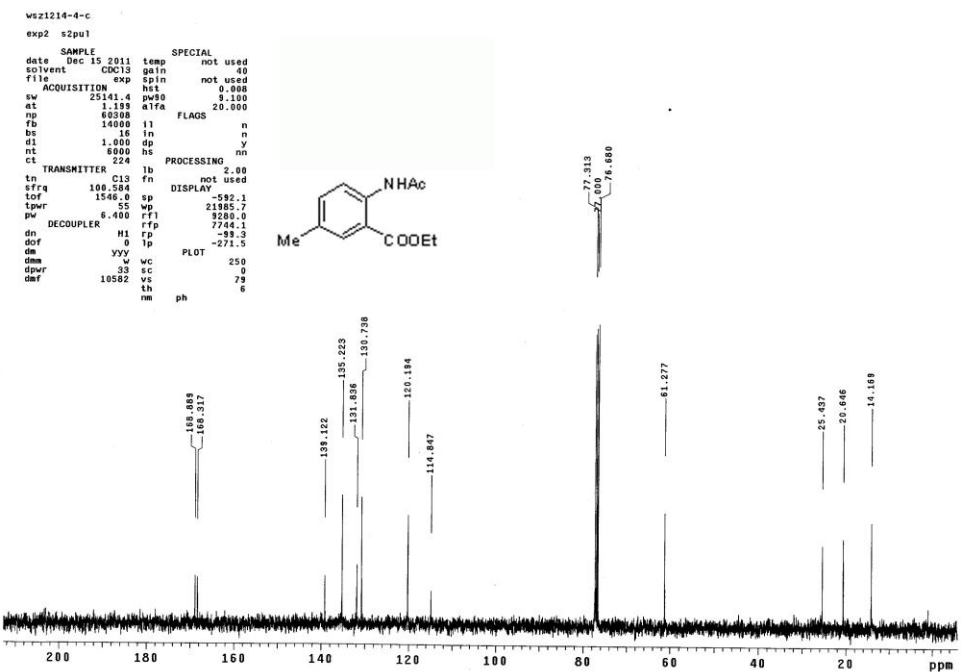

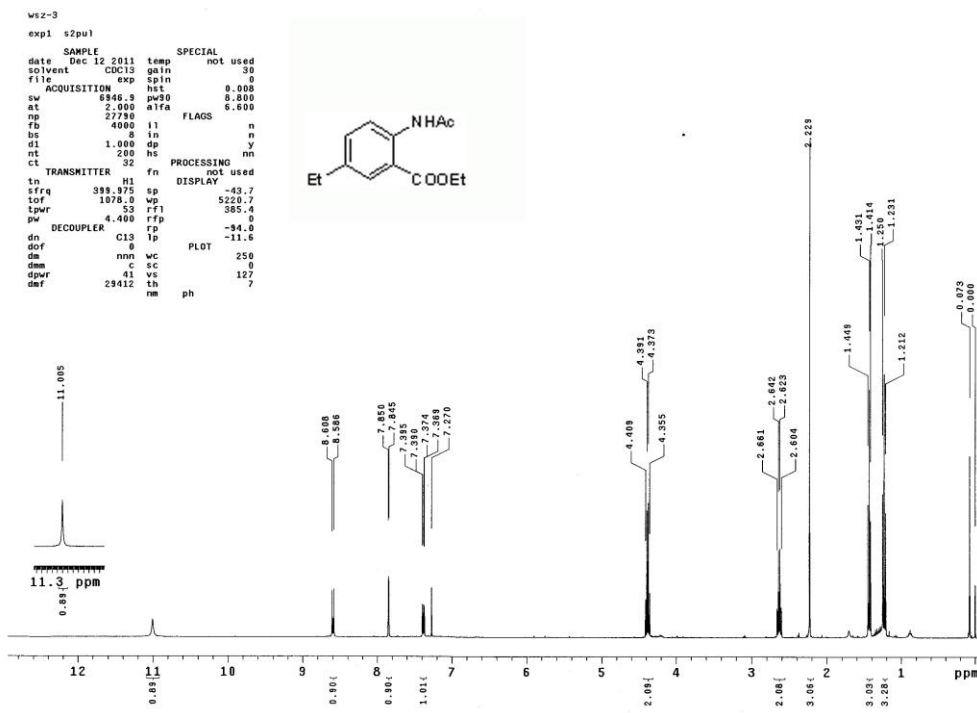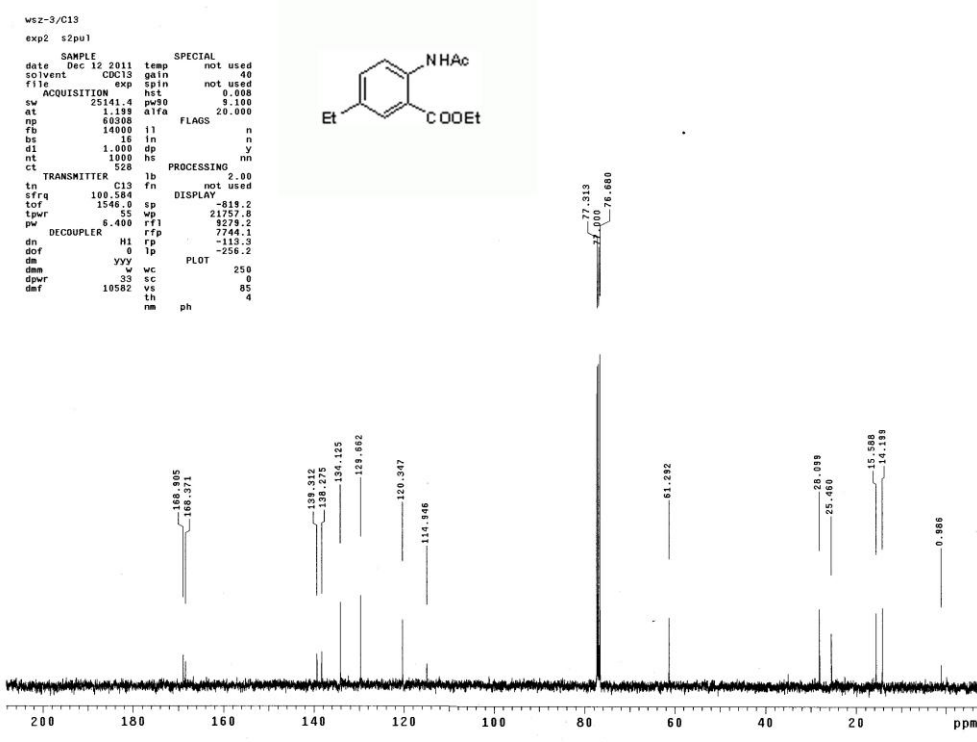

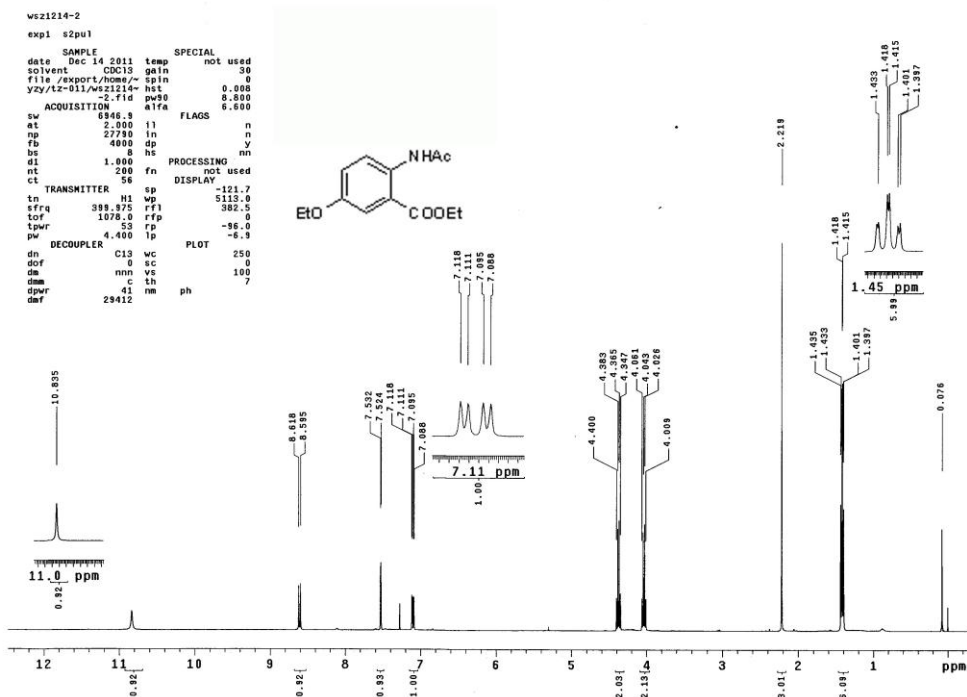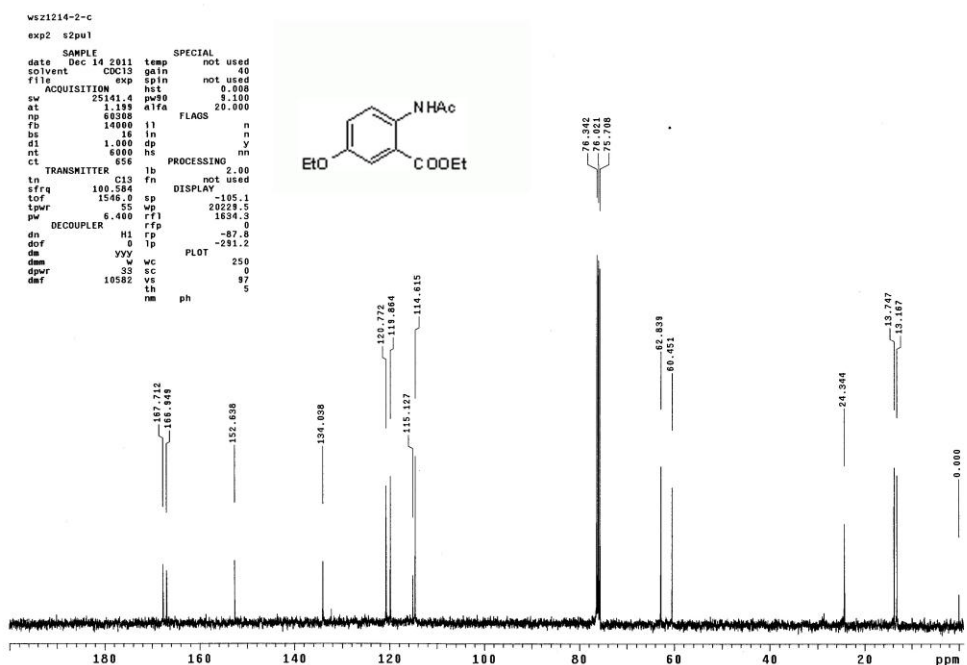



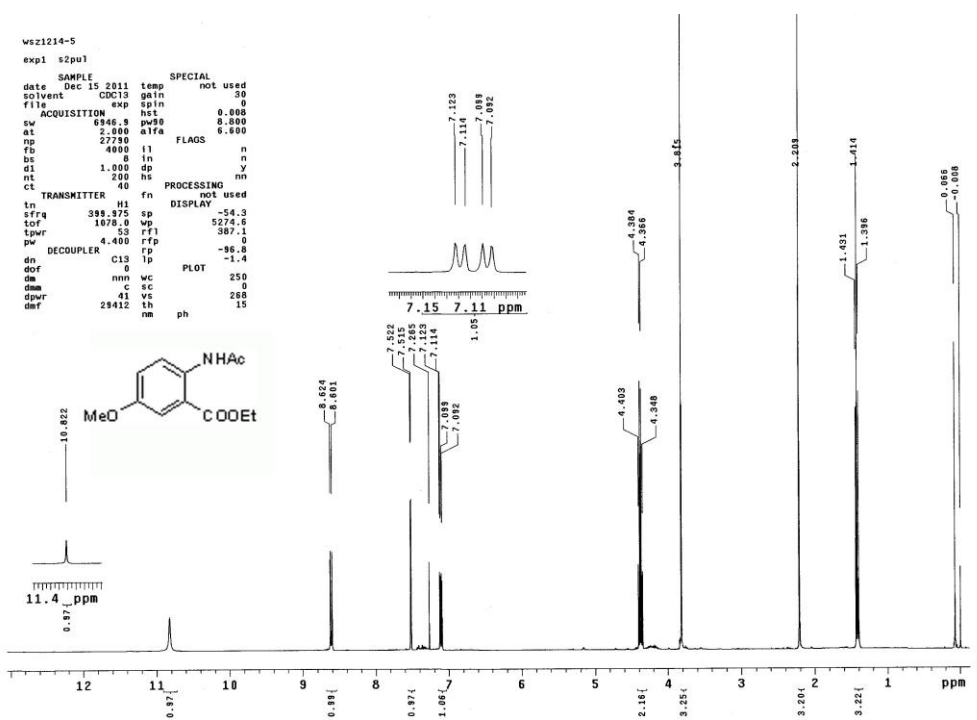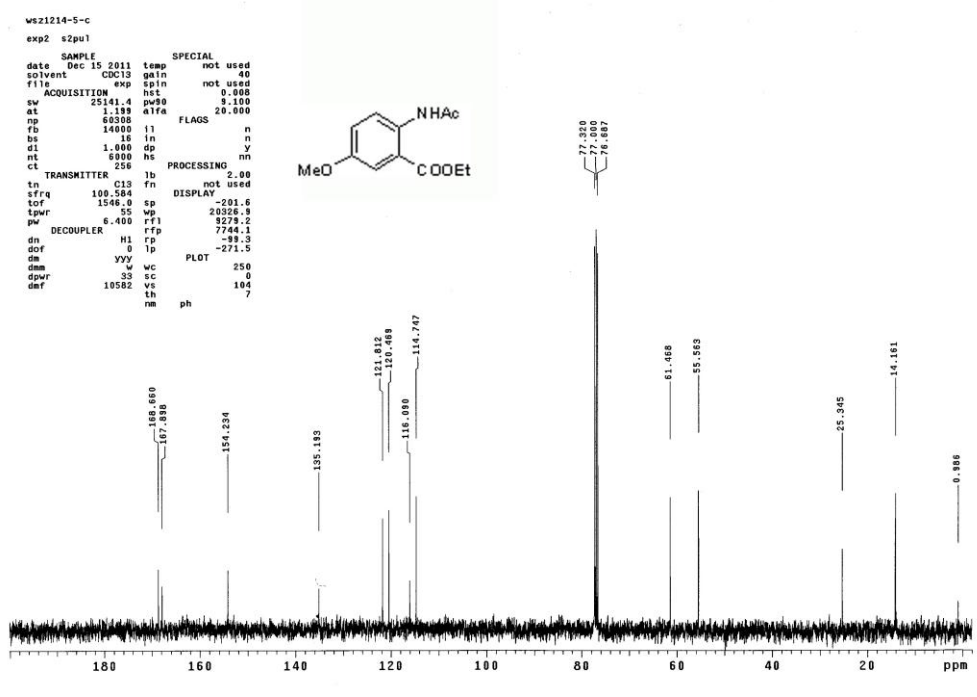

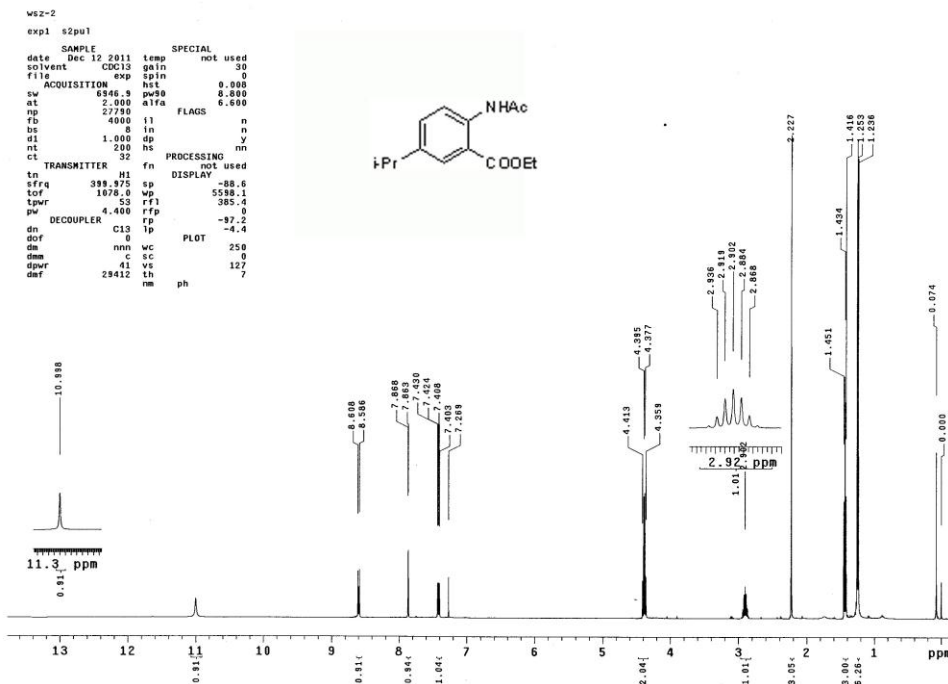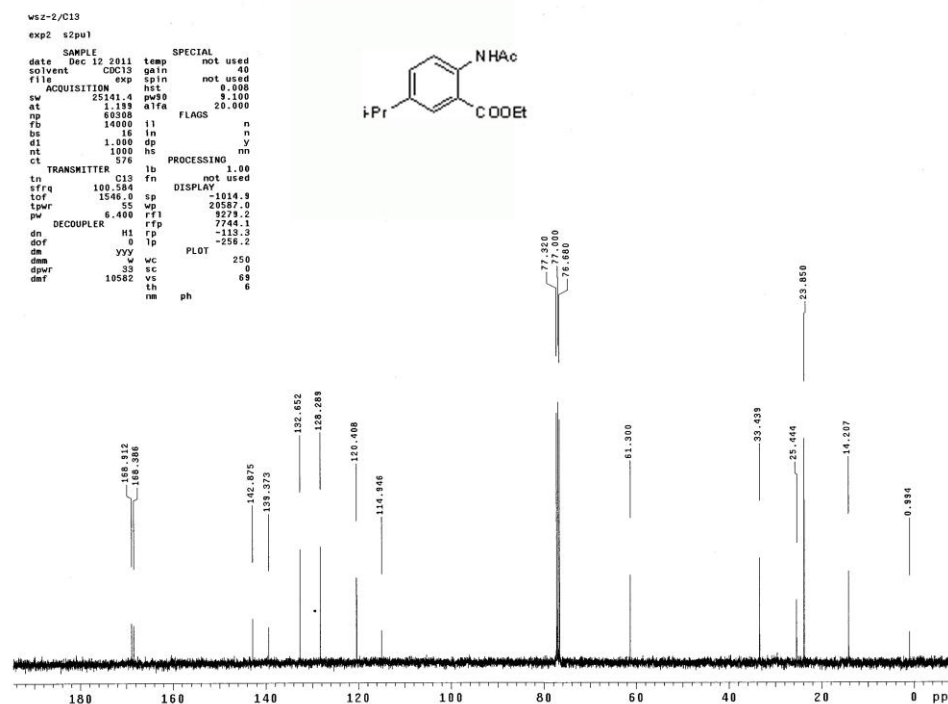

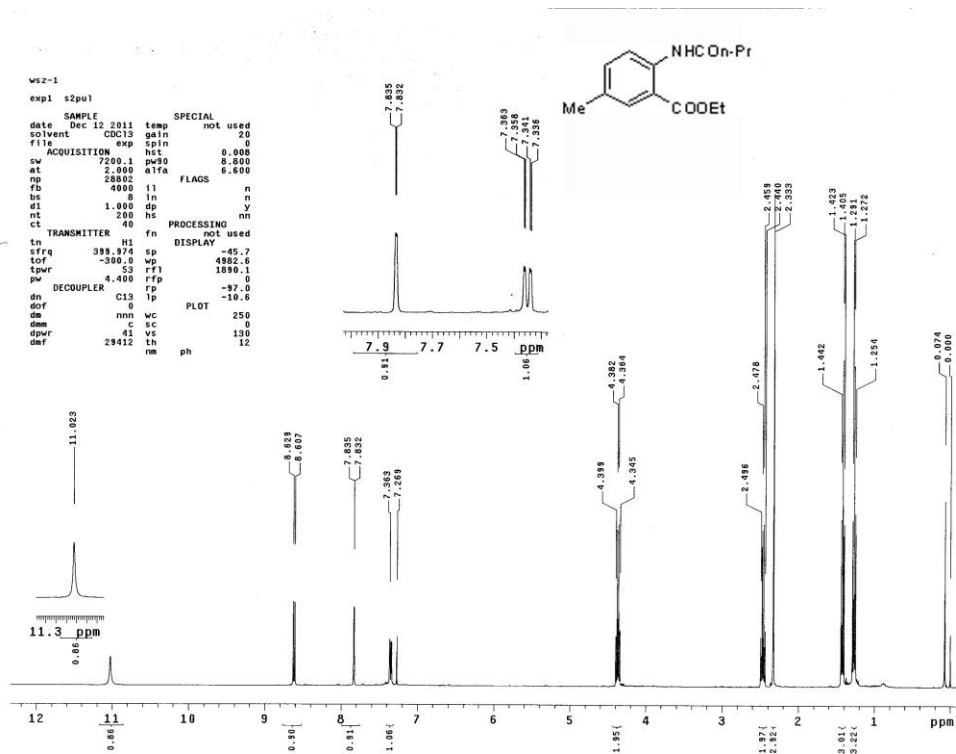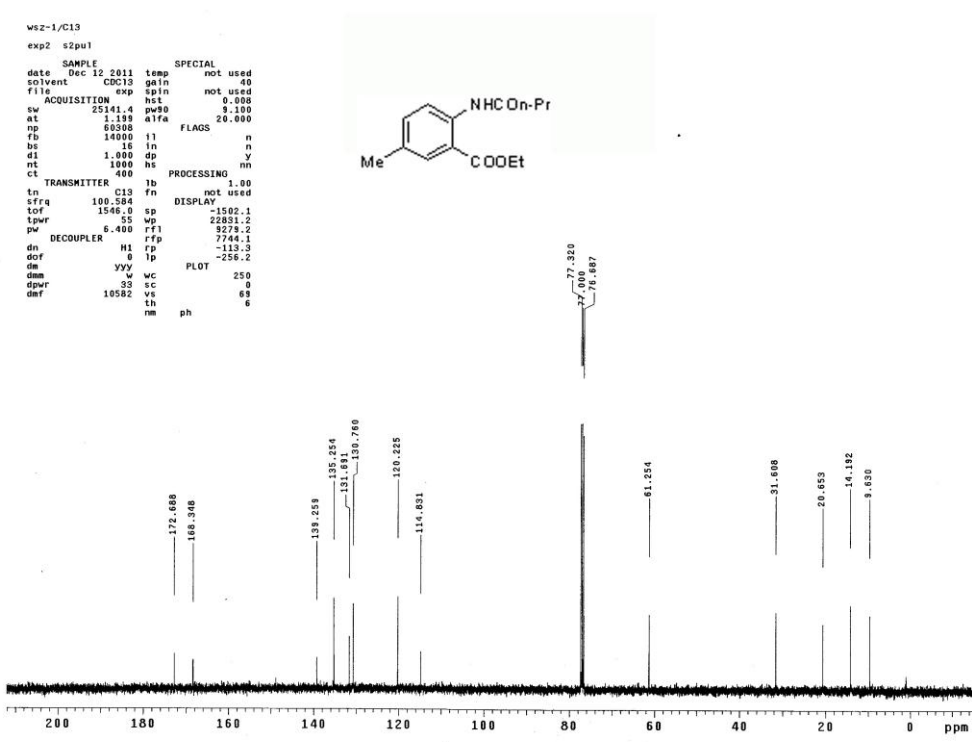

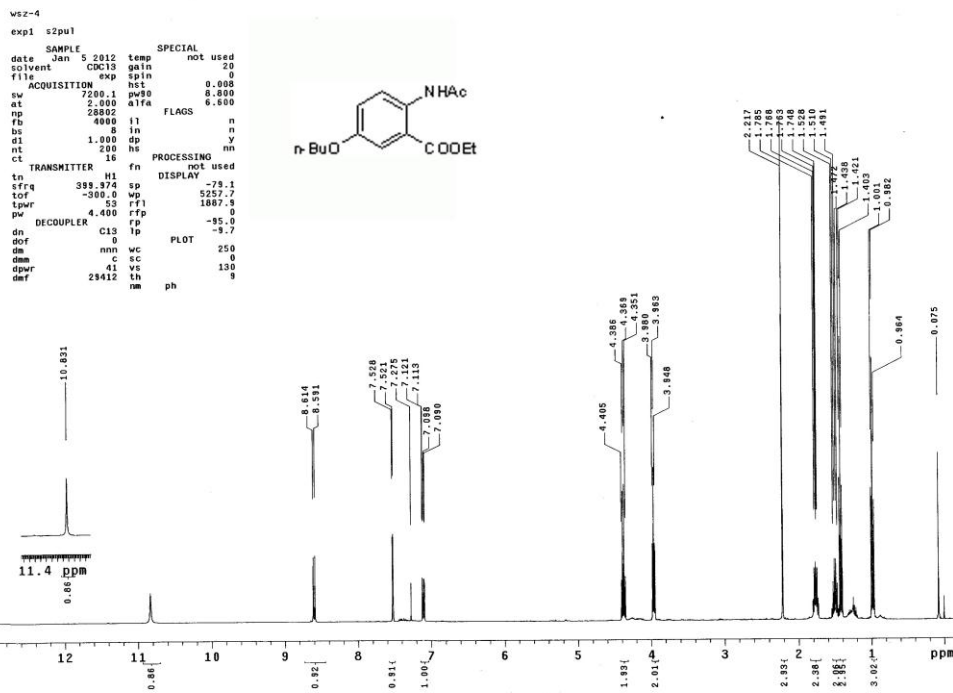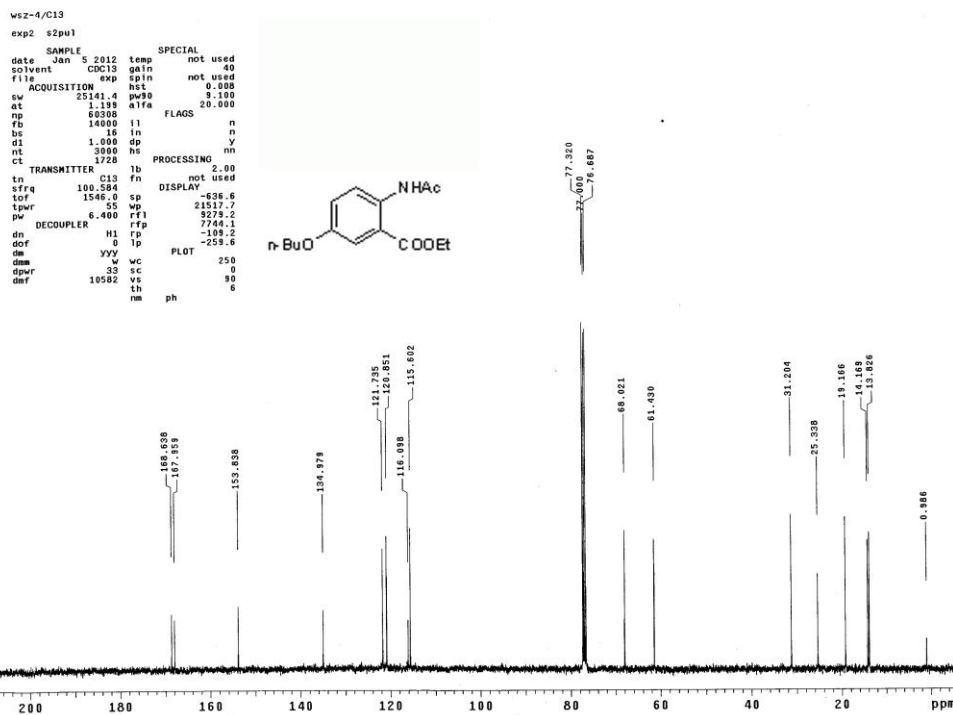

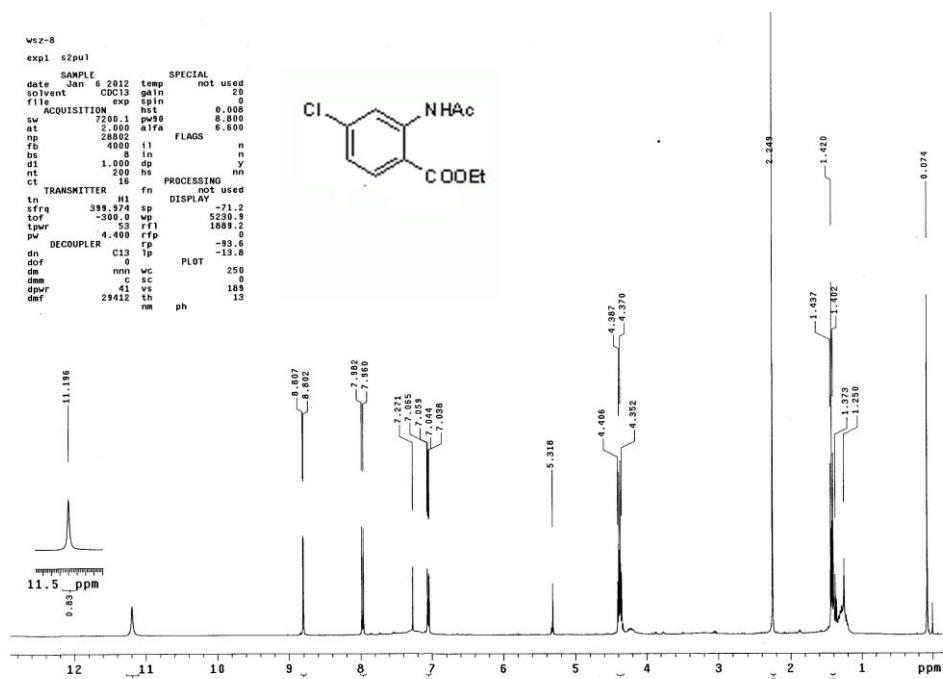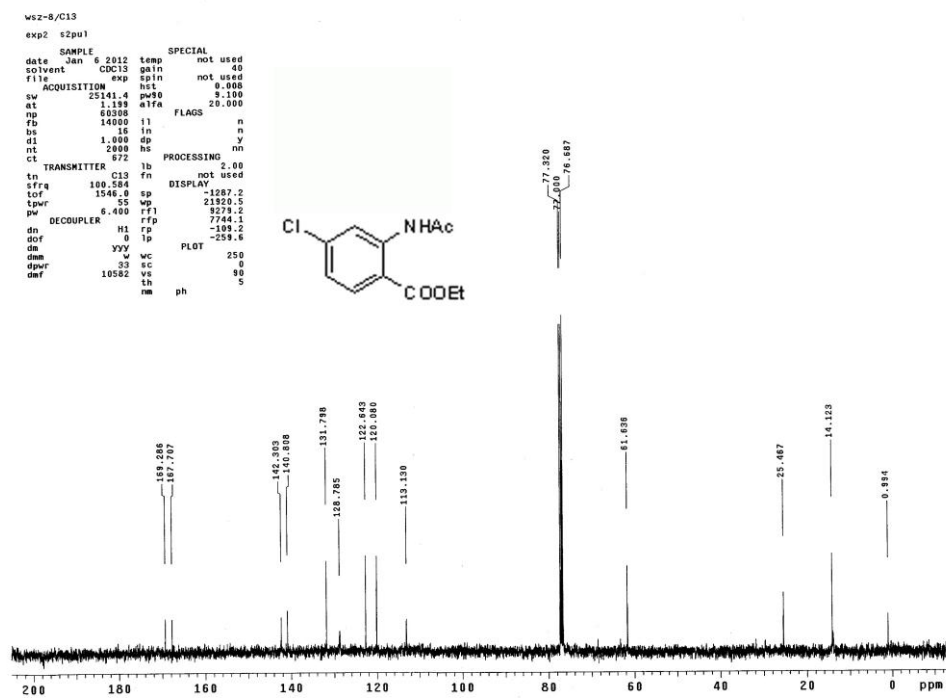

Supplement: c2cc34473d.pdf [file c2cc34473d.pdf]
